# Supplementary material for: Contradictions and convergences in recommendations on physical activity in pregnancy in different countries after the publication of the WHO guidelines in 2020—a scoping review
Source: Front Public Health. 2025 Apr 28;13:1540355. doi: 10.3389/fpubh.2025.1540355 (PMC12066438; doi:10.3389/fpubh.2025.1540355)
Supplement: Supplementary file 1 [file Data_Sheet_1.xlsx]

## Sheet: Supplementary materials
Authors or publishing organizations	Country	Year of publication	Title	Type of physical activity		Intensity of of physical activity		Methods of momonitoring the physical activity intensity		Time / duration of physical activity	Frequency of physical activity	Information on what is not recommended in relation to physical activity during pregnancy	Other information in relation to physical activity	Consistency of the information included
				Recommendation	Explanation/examples	Recommendation	Explanation/examples	Recommendation	Explanation/examples	General recommendations	General recommendations
American College of Obstetricians and Gynecologists (ACOG) (26)	United States	2020	Committee Opinion: Exercise during pregnancy and the postpartum period	*Aerobic exercises *Strength-conditioning exercises *Water exercises	*walking, swimming, stationary cycling, low-impact aerobics, modified yoga, and modified Pilates; *activities like jogging, running, and strength training may be safe for those who were regularly engaged in these activities before pregnancy, with consultation from a healthcare provider	*Moderate *Higher under strict medical supervision *Obesity: low to comfortable	*upper level of safe exercise intensity has not been establishe *Less than 60–80% of age-predicted maximum maternal heart rat	Borg ratings of perceived exer- tion scale the "talk test"	*12–14 on Borg scale *Using the “talk test” is another way to measure exertion: as long as a woman can carry on a conversation while exercising, she likely is not over- exerting herself (54).	30–60 minutes	At least 3–4 (up to daily)	* NOT: avoid contact activities with high risk of abdominal trauma or imbalance *Scuba diving should be avoided due to the risk of bubble formation affecting fetal pulmonary circulation *Exercising at altitudes above 6,000 feet may require caution *	*Heed any warning signs to discontinue exercise; *Vigorous-intensity exercise beyond 90% of maximum heart rate and certain strength-training activities may require special consideration; *Warning signs listed; *More data are needed from athletes who may exert beyond the accepted “vigorous” definition of up to 85% of capacity, and it is possible that there is an absolute level of intensity (or dur…	Yes
Austrian Health Promotion Fund (27)	Austria	2020	Austrian Physical Activity Recommendations – Key Messages	* aerobic activity; * muscle-strengthening exercises; * daily pelvic floor training.	*brisk walking, swimming, or stationary cycling	*Moderate *Women who were active before pregnancy, and who exceed this recommendation, can continue their usual physical activity behaviour and sports activities, as long as they feel comfortable. If necessary, the type and technique can be adapted and the duration or intensity can be reduced.	Not included	not included	not included	At least 150 minutes per week	Muscle-strengthening exercises: Recommended on 2 or more days a week, involving all major muscle groups	*Activities that avoid or interrupt long-term sitting;	*Regardless of whether they were regularly physically active before pregnancy or physically inactiv; * For women during an uncomplicated pregnancy; *Women who were active before pregnancy, and who exceed this recommendation, can continue their usual physical activity behaviour and sports activities, as long as they feel comfortable. If necessary, the type and technique can be adapted and the dura…	Yes
British Association of Sport and Exercise Medicine (28)	United Kingdon	2020	Physical Activity: A Guide For Health Practitioners. The benefits of physical activity on our health and wellbeing	*aerobic exercise *Strength conditioning exercises	walking, swimming, Dancing stationary cycling, Stretching - Yoga / Pilates	Moderate	Moderate intensity means that the activity will raise the heart rate and make the individual breathe faster but still allows them to carry on a conversation	not included	not included	least 150 minutes per week	*Strength conditioning exercises twice a week *For pregnant women who were not previously engaging in regular exercise, it is suggested to start with shorter durations, such as 10 to 20 minutes at a time, three times per week, and gradually build up the intensity, frequency, and duration of the activity. The overall goal is to reach a daily exercise duration of about 30 minutes, five to seven day…	*Contact sports such as rugby, soccer, boxing, basketball, and martial arts. Sports with a risk of falling like riding, skiing, off-road cycling, gymnastics, and horse riding. Scuba diving and skydiving. Exercising at high altitude and in hot temperatures. Exercising at high altitude (>6000 feet) and Exercising in hot temperatures (including ‘hot yoga’ or ‘hot Pilates’ ) After the first trimester…	*It emphasizes that ‘every activity counts’ and advises women to ‘listen to your body and adapt’ the activity accordingly; *Warning signs listed - when to stop; *Advice to a pregnant woman who is new to physical activity.	Yes
Department of Health Australian Government (29)	Australia	2020	Evidence-based physical activity guidelines for pregnant women	*do both aerobic and muscle strengthening exercises * do pelvic floor exercis	*Aerobic activities, which include brisk walking, cycling (stationary bike later in pregnancy), swimming, dancing, exercise classe *Strengthening activities, which include functional and postural exercise s, will maintain or improve musculoskeletal health (including core strength and endurance, flexibility and body composition, , using body weight, light weights or resistance ba * *modification:l…	Moderate to vigorous Higher after consulting a doctor	Not included	Rating of Perceived Exertion for Physical Activities	On our scale (right), where 1 is sedentary (not moving), and 10 is maximal effort, activities in the range 3-7 are considered safe and are recommended for health benefits in pregnant women	150 to 300 minutes (2½ to 5 hours) of moderate intensity physical activity or 75 to 150 minutes (1¼ to 2½ hours) of vigorous physical activity, or an equivalent combination of both moderate and vigorous activities, each week	150 to 300 minutes (2½ to 5 hours) of moderate intensity physical activity or 75 to 150 minutes (1¼ to 2½ hours) of vigorous physical activity, or an equivalent combination of both moderate and vigorous activities, each week * muscle strengthening activities on at least 2 days each wee	*heavy lifting and intense repetitive isometric exercises *Significant changes in pressure (eg sky diving, scuba diving) • Risk of contact/collision • Risk of falling (ie activities that require high levels of balance, coordination and agility	* Warning signs and contraindication; *Include modifying supine exercise; *Break up long periods of sitting as often as possible *Minimise the amount of time spent in prolonged sittin *Previously highly active women, including athletes who are already exceeding the amount of physical activity described in the Guidelines, may continue with their physical activity/exercise program, but should modif…	Yes
World Health Organization WHO (30)	International	2020	World Health Organization 2020 guidelines on physical activity and sedentary behaviour	aerobic and muscle- strengthening activities. gentle stretching , pelvic floor	not included	Moderate	Not included	Not included	Not included	at least 150 minute per week	*Pelvic floor muscle training may be performed on a daily basis	*the amount of time spent being sedentary *Avoid physical activity during excessive heat, especially with high humidity *Avoid participating in activities which involve physical contact; pose a high risk of falling; or might limit oxygenation (such as activities at high altitude, when not normally living at high altitude *Avoid activities in supine position after the first trimester of pregnancy *	* Before pregnancy, habitually engaged in vigorous- intensity aerobic activity, or who were physically active, can continue these activities during pregnancy and the postpartum period *the amount of time spent being sedentary with physical activity ofanyintensity (including light intensity); *Pregnant and postpartum women should start by doing small amounts of physical activity, and gradually inc…	Yes
Australian Government. Department of Health (AGDH) (31)	Australia	2021	Guidelines for physical activity during pregnancy	*aerobic activities that use large muscle groups – such as brisk walking, cycling, swimming, dancing, and exercise classes *muscle strengthening activities such as light resistance training or bodyweight exercise *pelvic floor exercise	* brisk walking, cycling, swimming, dancing, and exercise classes * light resistance training or bodyweight exercise	Moderate to vigorous	Not included	the ‘Talk Test’	be able to carry on a conversation during moderate intensity activities, but in vigorous intensity activities you’d find this difficult	*moderate intensity activities for 2½ to 5 hours each week; or vigorous intensity activities for 1¼ to 2½ hours each week (30 to 60 minutes of moderate intensity activity or do 15 to 30 minutes of vigorous intensity activity most day) *muscle strengthening activities at least 2 days each week *You can break down your activity into smaller segments throughout the day	*muscle strengthening activities at least 2 days each week	*risk of contact/collision *risk of falling (i.e. activities that require high levels of balance, coordination and agility) *significant changes in pressure (e.g. sky diving, scuba diving) *heavy lifting	*break up long periods of sitting and standing still *After 28 weeks you should not do exercises lying flat on your back. Instead, tilt your upper body to a 45-degree angle or do the exercises lying on your side *Avoid heat stress/hyperthermia *Avoid physical activities at high altitude (above 2000m) unless acclimatised and trained for the activity before pregnancy *Warning signs to stop physical…	Yes
Department of Ergometry, Exercise, Nuclear Cardiology, and Cardiovascular Rehabilitation of the Brazilian Society of Cardiology (32)	Brasil	2021	Position Statement on Exercise During Pregnancy and the Post-Partum Period	*Aerobic (low impact) walking, swimming, and using aerobic-based machines *resistance performed with free weights, weight machines, elastic bands, or body weight	*Aerobic (low impact) walking, swimming, and using aerobic-based machines *resistance performed with free weights, weight machines, elastic bands, or body weight	*Adapted from the ACSM.36 *Aerobic: Moderate - 60% to 80% HRmax or - % of other validated method (HRR, VO2) or - 12 to 13 Borg scale or - Corresponding to 4 - 6 MET *resistance: Moderate 2 to 3 sets and 10 to 12 repetitions	*Adapted from the ACSM.36 *Aerobic: Moderate - 60% to 80% HRmax or - % of other validated method (HRR, VO2) or - 12 to 13 Borg scale or - Corresponding to 4 - 6 MET *resistance: Moderate 2 to 3 sets and 10 to 12 repetitions	e perceived exertion with a Borg scale38 (Table 5) and the talk test, ie, an exercise intensity at which the individual can talk, but not sing	e perceived exertion with a Borg scale38 (Table 5) and the talk test, ie, an exercise intensity at which the individual can talk, but not sing	*aerobic: 20 to 30 minutes per session (goal - a total of 150 minutes/week) 10 to 15 minutes heating and cooling *resistance: 15 to 20 minutes 10 to 15 minutes of warm-up and cool-down *swimming/aqua aerobic:Up to 45 minutes/session	*3 to 5 days/week *Previously active women should continue regular aerobic exercise for at least 30 minutes, 4 to 5 times a week. Sedentary women can begin, for example, with 15 minutes of aerobic exercise 3 times a week and gradually increase the time until reaching the recommended 150 minutes/week or 30 minutes/day *Moderate-intensity resistance exercise is recommended for pregnant women three …	not included	include aerobic and moderate-intensity resistance exercise. It is important to remember that the time calculated for the training session should include a mild-intensity warm-up and cool-down period. *ATHLETES: Training and endurance tests, such as marathons, should be avoided because there is a risk of maternal hyperthermia in exercise sessions over 60 min. *Although some groups believe that exe…	Yes
European Board and College of Obstetrics and Gynaecology (EBCOG) (33)	International	2023	High-intensity exercise during pregnancy – A position paper by the European Board and College of Obstetrics and Gynaecology (EBCOG	aerobic resistance stretching	brisk walking, stationary cycling, mild aerobic exercises, yoga, Pilates, dancing, resistance and stretching exercises, and swimming that do not involve diving. and more depending upon their tolerance levels during pregnanc	Moderate Higher with caution	Women who are accustomed to high-intensity exercise can continue such activities during pregnancy and the puerperium, with appropriate caution in specific circumstances	not included	not included	at least 150 minutes of moderate to intense aerobic activity throughout the week	not included	CAUTION: *sport activities that place individuals at risk of direct abdominal trauma or sustaining a significant fa *sport activities with risks of indirect trauma, such as those due to sudden accelerations and decelerations. • sport activities where oxygen supply may be impaired. This criterion is particularly applicable to individuals with cyanotic respiratory or cardiovascular disorder.	not included	Yes
Polish Society of Gynecologists and Obstetricians (PTGiP) and Polish Society of Sports Medicine (PTMS) (34)	Poland	2023	Polish Society of Gynecologists and Obstetricians (PTGiP) and Polish Society of Sports Medicine (PTMS) recommendations on physical activity during pregnancy and the postpartum period	*Endurance exercise *Resistance exercises *Stretching exercises *Neuromotor exercise trainin *Pelvic floor training	endurance: walking, riding a stationary bicycle, dancing, aerobics, aquatic exercise. Many previous activities can be continued during pregnancy, with some modification *resistance: stationary machines, weight-bearing and non- weight bearing exercises, and bodyweight exercise	Moderate to high The intensity and type of exercise should be individualized Women with relative contraindications (e.g., a history of preterm Labor) should discuss the advantages and disadvantages of moderate- to high-intensity physical activity with their obstetrician -gynaecologist/perinatologist *resistance: appropriate intensity will be one that allows multiple submaximal- effort repetitions…	For most pregnant women, appropriate intensity will be one that allows multiple submaximal effort repetitions (e.g., 8–10 or 12–15 repetitions) to be performed until moderate fatigue At the end of the set of repetitions the woman should feel comfortable and have no pain Balance training intensity refers to the degree of difficulty of the positions or technical elements being practiced No recommen…	Borg Rating ofe heart rate response to exercise and/or ratings of perceived exertio Perceived Exertion (RPE)*, the talk test** or heart rate values	least 30 min of moderate- intensity exercise per day, up to a total of at least 150 minutes per week or 75 minutes of high-intensity exercise per week *The woman can assess her exertion using the 20-point Borg rating, e.g., as moderate_x0002_intensity between 13 and 14 (somewhat hard), or as high-intensity from 17 onwards (very hard) [5, 35]; **Another simple way to assess and monitor exercise in…	least 30 min of moderate- intensity exercise per day, up to a total of at least 150 minutes per week or 75 minutes of high-intensity exercise per week *Previously sedentary women: up to 3 days per week *Previously active women: 3-5 days per week, even every day Previously very active women can continue their training programs with the same requency, provided that the pregnancy develops normally *…	resistance: 2–3 non- consecutive days per week *stretching/neuromotor: At least 2–3 to 7 days per week *pelvic: 1 to 7 days per week	*Endurance exercise: Contact sports carrying a high risk of abdominal injury are not recommended. Similarly, sports entailing a high risk of falling are not recommended Underwater diving is not recommended during pregnancy, eithe *	*Women with previous exercise experience can participate in vigorous physical activity, provided that the pregnancy develops normally and is monitored continuously There is no conclusive data on the impact of maximum effort activity or exercises at more than 90% of the maximum heart rate on pregnancy *ABDOMINAL MUSCLE EXERCISE *Symptoms that require immediate cessation of exercise and an appointm…	Yes
Royal Australian and New Zealand College of Obstetricians and Gynaecologists (RANZCOG) (35)	Australia & New Zealand	2023	Exercise during Pregnancy	aerobic exercise pelvic floor exercise, strengthening exercises	aerobic activities include: Walking, especially at a brisk pace for aerobic benefit. Stationary cycling, Swimming and water-based activities *strengthening - Women without prior experience of resistance training can aim to perform 1 – 2 sets of 12 – 15 repetitions for each exercise	Moderate to vigorous	. Overall, these strengthening exercises should be perceived to be of “moderate” intensity (rating of perceived exertion 12- 14)	e heart rate response to exercise and/or ratings of perceived exertion (. Pregnancy-specific heart rate zones equivalent to 60- 80% of maximal aerobic capacity have been recommended for normal-weight pregnant women) * is the rating of perceived exertion *The “talk test”	*A rating of 12-14 on the 6-20 scale (Table 2; equating to a perception of working “somewhat hard”) reflects exercise of a moderate intensity * For previously inactive overweight or obese women with lower fitness levels, these heart rate zones may be too high for the initiation of an exercise program.25 Instead, a target heart rate of 102 – 124 bpm (for women 20-29 years) or 101 – 120 bpm (for 30…	150 to 300 minutes of moderate intensity physical activity each week ( most days of the week for at least 30 minutes at a time) * While no evidence exists for an upper limit to exercise duration, it is probably unwise to extend exercise duration beyond 60 minutes per session, unless the intensity is relatively light. *. For previously inactive women and those that are overweight or obese, a short…	most, preferably all days of the week * two sessions of strengthening exercises per week, on non-consecutive da	running, it is not advisable to commence during pregnancy ALE	*Water-based aerobics lasting 45 min in water temperatures up to 33.4 degrees Celsius appear unlikely to raise maternal core temperature above 38 degrees Celsius (with 39 degrees Celsius considered the teratogenic threshold *For women who are not previously accustomed to running, it is not advisable to commence during pregnancy – although there is a lack of scientific study around this notion. Fo…	Yes
